# Supplementary material
Source: Springer Nature journal article supplement (https://www.springermedizin.de/resource/supplementary/12879_2009_1052_MOESM1_ESM.pdf/9442472)

Meropenem MIC by agar  
dilution method (mg/L)

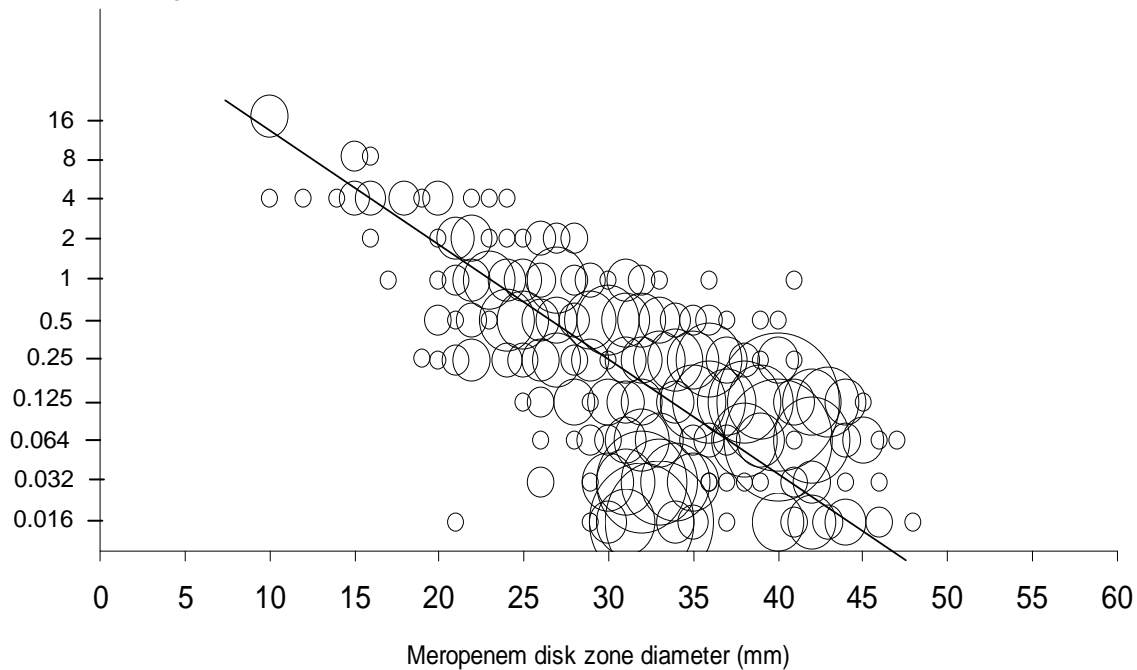

Supplement: MOESM1 [file 9442472]
